# Supplementary material for: Solving the golden transaction problem for ARIES-based multi-level recovery
Source: Royal Society of Chemistry journal article supplement (doi:10.1039/d0cp03053h), 2009-01-01
Supplement: d0cp03053h1.pdf [file d0cp03053h1.pdf]

SUPPORTING INFORMATION

**QM/MM MD Simulations Reveal an Asynchronous PCET  
mechanism for the Nitrite Reduction by Copper Nitrite Reductase**

Ronny Cheng,<sup>a</sup> Chun Wu,<sup>b\*</sup> Zexing Cao<sup>a\*</sup> and Binju Wang<sup>a\*</sup>

<sup>a</sup>State Key Laboratory of Physical Chemistry of Solid Surfaces and Fujian Provincial Key Laboratory of Theoretical and Computational Chemistry, College of Chemistry and Chemical Engineering, Xiamen University, Xiamen 361005, P. R. China

<sup>b</sup>College of Science and Mathematics, Rowan University, Glassboro, NJ, 08028 USA

## Force field of CuNiR used in this study

REMARK GOES HERE, THIS FILE IS GENERATED BY MCPB.PY

### MASS

|    |       |       |                                            |
|----|-------|-------|--------------------------------------------|
| M1 | 63.55 |       | Cu ion                                     |
| Y1 | 14.01 | 0.530 | sp2 N in 5 memb.ring w/LP (HIS,ADE,GUA)    |
| Y2 | 32.06 | 2.900 | S in cystine                               |
| Y3 | 14.01 | 0.530 | sp2 N in 5 memb.ring w/LP (HIS,ADE,GUA)    |
| Y4 | 32.06 | 2.900 | S in disulfide linkage,pol:JPC,102,2399,98 |

### BOND

|       |       |        |                                              |
|-------|-------|--------|----------------------------------------------|
| Y1-M1 | 71.0  | 2.0676 | Created by Seminario method using MCPB.py    |
| Y2-M1 | 70.8  | 2.3055 | Created by Seminario method using MCPB.py    |
| Y3-M1 | 65.1  | 2.0404 | Created by Seminario method using MCPB.py    |
| Y4-M1 | 17.8  | 2.4998 | Created by Seminario method using MCPB.py    |
| 2C-Y2 | 237.0 | 1.8100 |                                              |
| 2C-Y4 | 227.0 | 1.8100 |                                              |
| CC-Y1 | 410.0 | 1.394  | JCC,7,(1986),230; HIS                        |
| CC-Y3 | 410.0 | 1.394  | JCC,7,(1986),230; HIS                        |
| Y1-CR | 488.0 | 1.335  | JCC,7,(1986),230; HIS                        |
| Y3-CR | 488.0 | 1.335  | JCC,7,(1986),230; HIS                        |
| Y4-CT | 227.0 | 1.810  | changed from 222.0 based on dimethylS nmodes |

### ANGL

|          |        |        |                                           |
|----------|--------|--------|-------------------------------------------|
| 2C-Y2-M1 | 49.52  | 113.60 | Created by Seminario method using MCPB.py |
| 2C-Y4-M1 | 65.94  | 109.00 | Created by Seminario method using MCPB.py |
| CC-Y1-M1 | 106.81 | 123.68 | Created by Seminario method using MCPB.py |
| CC-Y3-M1 | 81.60  | 129.98 | Created by Seminario method using MCPB.py |
| M1-Y1-CR | 98.93  | 128.80 | Created by Seminario method using MCPB.py |
| M1-Y3-CR | 79.36  | 122.47 | Created by Seminario method using MCPB.py |
| M1-Y4-CT | 21.55  | 100.39 | Created by Seminario method using MCPB.py |
| Y1-M1-Y2 | 42.65  | 142.18 | Created by Seminario method using MCPB.py |

|          |       |        |                                           |                             |
|----------|-------|--------|-------------------------------------------|-----------------------------|
| Y1-M1-Y3 | 48.49 | 94.15  | Created by Seminario method using MCPB.py |                             |
| Y1-M1-Y4 | 50.64 | 85.33  | Created by Seminario method using MCPB.py |                             |
| Y2-M1-Y3 | 33.65 | 96.78  | Created by Seminario method using MCPB.py |                             |
| Y2-M1-Y4 | 46.62 | 103.81 | Created by Seminario method using MCPB.py |                             |
| Y3-M1-Y4 | 21.54 | 146.86 | Created by Seminario method using MCPB.py |                             |
| 2C-2C-Y4 | 50.0  | 114.70 |                                           |                             |
| 2C-Y4-CT | 62.0  | 98.90  |                                           |                             |
| CC-Y1-CR | 70.0  | 117.00 | AA his                                    |                             |
| CC-Y3-CR | 70.0  | 117.00 | AA his                                    |                             |
| CT-CC-Y1 | 70.0  | 120.00 | AA his                                    |                             |
| CT-CC-Y3 | 70.0  | 120.00 | AA his                                    |                             |
| CW-CC-Y1 | 70.0  | 120.00 | AA his                                    |                             |
| CW-CC-Y3 | 70.0  | 120.00 | AA his                                    |                             |
| CX-2C-Y2 | 50.0  | 108.60 |                                           |                             |
| H1-2C-Y2 | 50.0  | 109.50 |                                           |                             |
| H1-2C-Y4 | 50.0  | 109.50 |                                           |                             |
| Y1-CR-H5 | 50.0  | 120.00 | AA his                                    |                             |
| Y1-CR-NA | 70.0  | 120.00 | AA his                                    |                             |
| Y3-CR-H5 | 50.0  | 120.00 | AA his                                    |                             |
| Y3-CR-NA | 70.0  | 120.00 | AA his                                    |                             |
| Y4-CT-H1 | 50.0  | 109.50 | AA cys                                    | changed based on NMA nmodes |

#### DIHE

|             |   |       |       |      |                             |
|-------------|---|-------|-------|------|-----------------------------|
| X-2C-Y4-X   | 3 | 1.0   | 0.0   | 3.0  | JCC,7,(1986),230 (X-CT-S-X) |
| X-CC-Y1-X   | 2 | 4.8   | 180.0 | 2.0  | JCC,7,(1986),230            |
| X-CC-Y3-X   | 2 | 4.8   | 180.0 | 2.0  | JCC,7,(1986),230            |
| X-Y1-CR-X   | 2 | 10.0  | 180.0 | 2.0  | JCC,7,(1986),230            |
| X-Y3-CR-X   | 2 | 10.0  | 180.0 | 2.0  | JCC,7,(1986),230            |
| 2C-2C-Y4-CT | 1 | 0.057 | 0.0   | -4.0 |                             |
| 2C-2C-Y4-CT | 1 | 0.414 | 0.0   | -3.0 |                             |
| 2C-2C-Y4-CT | 1 | 0.442 | 0.0   | -2.0 |                             |
| 2C-2C-Y4-CT | 1 | 0.247 | 180.0 | 1.0  |                             |

|             |   |       |       |      |                          |
|-------------|---|-------|-------|------|--------------------------|
| 2C-2C-Y4-M1 | 3 | 0.00  | 0.00  | 3.0  | Treat as zero by MCPB.py |
| 2C-Y2-M1-Y3 | 3 | 0.00  | 0.00  | 3.0  | Treat as zero by MCPB.py |
| 2C-Y2-M1-Y4 | 3 | 0.00  | 0.00  | 3.0  | Treat as zero by MCPB.py |
| 2C-Y4-CT-H1 | 3 | 1.0   | 0.0   | 3.0  |                          |
| CC-Y1-M1-Y2 | 3 | 0.00  | 0.00  | 3.0  | Treat as zero by MCPB.py |
| CC-Y1-M1-Y3 | 3 | 0.00  | 0.00  | 3.0  | Treat as zero by MCPB.py |
| CC-Y1-M1-Y4 | 3 | 0.00  | 0.00  | 3.0  | Treat as zero by MCPB.py |
| CC-Y3-M1-Y4 | 3 | 0.00  | 0.00  | 3.0  | Treat as zero by MCPB.py |
| CT-CC-Y1-M1 | 3 | 0.00  | 0.00  | 3.0  | Treat as zero by MCPB.py |
| CT-CC-Y3-M1 | 3 | 0.00  | 0.00  | 3.0  | Treat as zero by MCPB.py |
| CW-CC-Y1-M1 | 3 | 0.00  | 0.00  | 3.0  | Treat as zero by MCPB.py |
| CW-CC-Y3-M1 | 3 | 0.00  | 0.00  | 3.0  | Treat as zero by MCPB.py |
| CX-2C-2C-Y4 | 1 | 0.028 | 0.0   | -4.0 |                          |
| CX-2C-2C-Y4 | 1 | 0.016 | 0.0   | -3.0 |                          |
| CX-2C-2C-Y4 | 1 | 0.245 | 0.0   | -2.0 |                          |
| CX-2C-2C-Y4 | 1 | 0.417 | 0.0   | 1.0  |                          |
| CX-2C-Y2-M1 | 3 | 0.00  | 0.00  | 3.0  | Treat as zero by MCPB.py |
| CX-CT-CC-Y1 | 1 | 0.047 | 180.0 | -4.0 |                          |
| CX-CT-CC-Y1 | 1 | 0.74  | 0.0   | -3.0 |                          |
| CX-CT-CC-Y1 | 1 | 0.204 | 0.0   | -2.0 |                          |
| CX-CT-CC-Y1 | 1 | 0.69  | 0.0   | 1.0  |                          |
| CX-CT-CC-Y3 | 1 | 0.047 | 180.0 | -4.0 |                          |
| CX-CT-CC-Y3 | 1 | 0.74  | 0.0   | -3.0 |                          |
| CX-CT-CC-Y3 | 1 | 0.204 | 0.0   | -2.0 |                          |
| CX-CT-CC-Y3 | 1 | 0.69  | 0.0   | 1.0  |                          |
| H1-2C-Y2-M1 | 3 | 0.00  | 0.00  | 3.0  | Treat as zero by MCPB.py |
| H1-2C-Y4-M1 | 3 | 0.00  | 0.00  | 3.0  | Treat as zero by MCPB.py |
| M1-Y1-CR-H5 | 3 | 0.00  | 0.00  | 3.0  | Treat as zero by MCPB.py |
| M1-Y1-CR-NA | 3 | 0.00  | 0.00  | 3.0  | Treat as zero by MCPB.py |
| M1-Y3-CR-H5 | 3 | 0.00  | 0.00  | 3.0  | Treat as zero by MCPB.py |
| M1-Y3-CR-NA | 3 | 0.00  | 0.00  | 3.0  | Treat as zero by MCPB.py |
| M1-Y4-CT-H1 | 3 | 0.00  | 0.00  | 3.0  | Treat as zero by MCPB.py |

|             |   |       |       |      |                          |
|-------------|---|-------|-------|------|--------------------------|
| N -CX-2C-Y2 | 1 | 0.033 | 0.0   | -4.0 |                          |
| N -CX-2C-Y2 | 1 | 0.251 | 0.0   | -3.0 |                          |
| N -CX-2C-Y2 | 1 | 0.486 | 180.0 | -2.0 |                          |
| N -CX-2C-Y2 | 1 | 0.154 | 0.0   | 1.0  |                          |
| Y1-M1-Y2-2C | 3 | 0.00  | 0.00  | 3.0  | Treat as zero by MCPB.py |
| Y1-M1-Y3-CC | 3 | 0.00  | 0.00  | 3.0  | Treat as zero by MCPB.py |
| Y1-M1-Y3-CR | 3 | 0.00  | 0.00  | 3.0  | Treat as zero by MCPB.py |
| Y1-M1-Y4-2C | 3 | 0.00  | 0.00  | 3.0  | Treat as zero by MCPB.py |
| Y1-M1-Y4-CT | 3 | 0.00  | 0.00  | 3.0  | Treat as zero by MCPB.py |
| Y2-2C-CX-C  | 1 | 0.075 | 0.0   | -4.0 | C                        |
| Y2-2C-CX-C  | 1 | 0.251 | 0.0   | -3.0 |                          |
| Y2-2C-CX-C  | 1 | 0.337 | 180.0 | -2.0 |                          |
| Y2-2C-CX-C  | 1 | 0.269 | 180.0 | 1.0  |                          |
| Y2-M1-Y1-CR | 3 | 0.00  | 0.00  | 3.0  | Treat as zero by MCPB.py |
| Y2-M1-Y3-CC | 3 | 0.00  | 0.00  | 3.0  | Treat as zero by MCPB.py |
| Y2-M1-Y3-CR | 3 | 0.00  | 0.00  | 3.0  | Treat as zero by MCPB.py |
| Y2-M1-Y4-2C | 3 | 0.00  | 0.00  | 3.0  | Treat as zero by MCPB.py |
| Y2-M1-Y4-CT | 3 | 0.00  | 0.00  | 3.0  | Treat as zero by MCPB.py |
| Y3-M1-Y1-CR | 3 | 0.00  | 0.00  | 3.0  | Treat as zero by MCPB.py |
| Y3-M1-Y4-2C | 3 | 0.00  | 0.00  | 3.0  | Treat as zero by MCPB.py |
| Y3-M1-Y4-CT | 3 | 0.00  | 0.00  | 3.0  | Treat as zero by MCPB.py |
| Y4-M1-Y1-CR | 3 | 0.00  | 0.00  | 3.0  | Treat as zero by MCPB.py |
| Y4-M1-Y3-CR | 3 | 0.00  | 0.00  | 3.0  | Treat as zero by MCPB.py |

#### IMPR

|             |     |      |    |
|-------------|-----|------|----|
| CT-CW-CC-Y3 | 1.1 | 180. | 2. |
| CT-CW-CC-Y1 | 1.1 | 180. | 2. |

#### NONB

|    |        |              |                                                                     |
|----|--------|--------------|---------------------------------------------------------------------|
| M1 | 1.2140 | 0.0013919600 | IOD set for Cu <sup>+</sup> ion from Li et al. JCTC, 2015, 11, 1645 |
| Y1 | 1.8240 | 0.1700       | OPLS                                                                |
| Y2 | 2.0000 | 0.2500       | W. Cornell CH3SH and CH3SCH3 FEP's                                  |

|    |        |        |                                    |
|----|--------|--------|------------------------------------|
| Y3 | 1.8240 | 0.1700 | OPLS                               |
| Y4 | 2.0000 | 0.2500 | W. Cornell CH3SH and CH3SCH3 FEP's |

REMARK GOES HERE, THIS FILE IS GENERATED BY MCPB.PY

#### MASS

|    |       |       |                                         |
|----|-------|-------|-----------------------------------------|
| M2 | 63.55 |       | Cu ion                                  |
| Y5 | 14.01 | 0.530 | sp2 N in 5 memb.ring w/LP (HIS,ADE,GUA) |
| Y6 | 14.01 | 0.530 | sp2 N in 5 memb.ring w/LP (HIS,ADE,GUA) |
| Y7 | 14.01 | 0.530 | sp2 N in 5 memb.ring w/LP (HIS,ADE,GUA) |
| Y8 | 16.00 | 0.434 | Oxygen with one connected atom          |
| Y9 | 16.00 | 0.434 | Oxygen with one connected atom          |

#### BOND

|       |       |        |                                           |     |        |
|-------|-------|--------|-------------------------------------------|-----|--------|
| M2-Y8 | 45.3  | 2.0754 | Created by Seminario method using MCPB.py |     |        |
| M2-Y9 | 7.3   | 2.8038 | Created by Seminario method using MCPB.py |     |        |
| Y5-M2 | 60.9  | 2.0563 | Created by Seminario method using MCPB.py |     |        |
| Y6-M2 | 80.7  | 2.0139 | Created by Seminario method using MCPB.py |     |        |
| Y7-M2 | 81.2  | 2.0191 | Created by Seminario method using MCPB.py |     |        |
| CR-Y5 | 488.0 | 1.335  | JCC,7,(1986),230; HIS                     |     |        |
| CR-Y6 | 488.0 | 1.335  | JCC,7,(1986),230; HIS                     |     |        |
| CR-Y7 | 488.0 | 1.335  | JCC,7,(1986),230; HIS                     |     |        |
| CV-Y5 | 410.0 | 1.394  | JCC,7,(1986),230; HIS                     |     |        |
| CV-Y6 | 410.0 | 1.394  | JCC,7,(1986),230; HIS                     |     |        |
| CV-Y7 | 410.0 | 1.394  | JCC,7,(1986),230; HIS                     |     |        |
| n2-Y8 | 766.3 | 1.2172 | SOURCE3_SOURCE5                           | 112 | 0.0102 |
| n2-Y9 | 766.3 | 1.2172 | SOURCE3_SOURCE5                           | 112 | 0.0102 |

#### ANGL

|          |       |        |                                           |  |  |
|----------|-------|--------|-------------------------------------------|--|--|
| CR-Y5-M2 | 73.50 | 128.91 | Created by Seminario method using MCPB.py |  |  |
| CR-Y6-M2 | 99.65 | 126.19 | Created by Seminario method using MCPB.py |  |  |
| CR-Y7-M2 | 90.03 | 129.50 | Created by Seminario method using MCPB.py |  |  |
| CV-Y5-M2 | 77.55 | 124.49 | Created by Seminario method using MCPB.py |  |  |

|          |        |        |                                           |
|----------|--------|--------|-------------------------------------------|
| CV-Y6-M2 | 103.98 | 125.79 | Created by Seminario method using MCPB.py |
| CV-Y7-M2 | 93.35  | 123.45 | Created by Seminario method using MCPB.py |
| M2-Y8-n2 | 110.10 | 115.13 | Created by Seminario method using MCPB.py |
| M2-Y9-n2 | 84.55  | 79.78  | Created by Seminario method using MCPB.py |
| Y5-M2-Y6 | 62.00  | 90.99  | Created by Seminario method using MCPB.py |
| Y5-M2-Y7 | 59.97  | 94.65  | Created by Seminario method using MCPB.py |
| Y5-M2-Y8 | 58.72  | 170.69 | Created by Seminario method using MCPB.py |
| Y5-M2-Y9 | 48.38  | 121.89 | Created by Seminario method using MCPB.py |
| Y6-M2-Y7 | 55.48  | 169.31 | Created by Seminario method using MCPB.py |
| Y6-M2-Y8 | 54.63  | 88.24  | Created by Seminario method using MCPB.py |
| Y6-M2-Y9 | 44.53  | 89.67  | Created by Seminario method using MCPB.py |
| Y7-M2-Y8 | 56.99  | 87.64  | Created by Seminario method using MCPB.py |
| Y7-M2-Y9 | 43.71  | 95.02  | Created by Seminario method using MCPB.py |
| Y9-M2-Y8 | 70.93  | 48.84  | Created by Seminario method using MCPB.py |
| CC-CV-Y5 | 70.0   | 120.00 | AA his                                    |
| CC-CV-Y6 | 70.0   | 120.00 | AA his                                    |
| CC-CV-Y7 | 70.0   | 120.00 | AA his                                    |
| CV-Y5-CR | 70.0   | 117.00 | AA his                                    |
| CV-Y6-CR | 70.0   | 117.00 | AA his                                    |
| CV-Y7-CR | 70.0   | 117.00 | AA his                                    |
| H4-CV-Y5 | 50.0   | 120.00 | AA his                                    |
| H4-CV-Y6 | 50.0   | 120.00 | AA his                                    |
| H4-CV-Y7 | 50.0   | 120.00 | AA his                                    |
| H5-CR-Y5 | 50.0   | 120.00 | AA his                                    |
| H5-CR-Y6 | 50.0   | 120.00 | AA his                                    |
| H5-CR-Y7 | 50.0   | 120.00 | AA his                                    |
| NA-CR-Y5 | 70.0   | 120.00 | AA his                                    |
| NA-CR-Y6 | 70.0   | 120.00 | AA his                                    |
| NA-CR-Y7 | 70.0   | 120.00 | AA his                                    |
| Y9-n2-Y8 | 80.5   | 115.37 | SOURCE3 1                                 |

DIHE

|             |   |      |       |     |                          |
|-------------|---|------|-------|-----|--------------------------|
| X -CR-Y5-X  | 2 | 10.0 | 180.0 | 2.0 | JCC,7,(1986),230         |
| X -CR-Y6-X  | 2 | 10.0 | 180.0 | 2.0 | JCC,7,(1986),230         |
| X -CR-Y7-X  | 2 | 10.0 | 180.0 | 2.0 | JCC,7,(1986),230         |
| X -CV-Y5-X  | 2 | 4.8  | 180.0 | 2.0 | JCC,7,(1986),230         |
| X -CV-Y6-X  | 2 | 4.8  | 180.0 | 2.0 | JCC,7,(1986),230         |
| X -CV-Y7-X  | 2 | 4.8  | 180.0 | 2.0 | JCC,7,(1986),230         |
| CC-CV-Y5-M2 | 3 | 0.00 | 0.00  | 3.0 | Treat as zero by MCPB.py |
| CC-CV-Y6-M2 | 3 | 0.00 | 0.00  | 3.0 | Treat as zero by MCPB.py |
| CC-CV-Y7-M2 | 3 | 0.00 | 0.00  | 3.0 | Treat as zero by MCPB.py |
| CR-Y5-M2-Y6 | 3 | 0.00 | 0.00  | 3.0 | Treat as zero by MCPB.py |
| CR-Y5-M2-Y7 | 3 | 0.00 | 0.00  | 3.0 | Treat as zero by MCPB.py |
| CR-Y5-M2-Y8 | 3 | 0.00 | 0.00  | 3.0 | Treat as zero by MCPB.py |
| CR-Y5-M2-Y9 | 3 | 0.00 | 0.00  | 3.0 | Treat as zero by MCPB.py |
| CR-Y6-M2-Y7 | 3 | 0.00 | 0.00  | 3.0 | Treat as zero by MCPB.py |
| CR-Y6-M2-Y8 | 3 | 0.00 | 0.00  | 3.0 | Treat as zero by MCPB.py |
| CR-Y6-M2-Y9 | 3 | 0.00 | 0.00  | 3.0 | Treat as zero by MCPB.py |
| CR-Y7-M2-Y8 | 3 | 0.00 | 0.00  | 3.0 | Treat as zero by MCPB.py |
| CR-Y7-M2-Y9 | 3 | 0.00 | 0.00  | 3.0 | Treat as zero by MCPB.py |
| CV-Y5-M2-Y6 | 3 | 0.00 | 0.00  | 3.0 | Treat as zero by MCPB.py |
| CV-Y5-M2-Y7 | 3 | 0.00 | 0.00  | 3.0 | Treat as zero by MCPB.py |
| CV-Y5-M2-Y8 | 3 | 0.00 | 0.00  | 3.0 | Treat as zero by MCPB.py |
| CV-Y5-M2-Y9 | 3 | 0.00 | 0.00  | 3.0 | Treat as zero by MCPB.py |
| CV-Y6-M2-Y7 | 3 | 0.00 | 0.00  | 3.0 | Treat as zero by MCPB.py |
| CV-Y6-M2-Y8 | 3 | 0.00 | 0.00  | 3.0 | Treat as zero by MCPB.py |
| CV-Y6-M2-Y9 | 3 | 0.00 | 0.00  | 3.0 | Treat as zero by MCPB.py |
| CV-Y7-M2-Y8 | 3 | 0.00 | 0.00  | 3.0 | Treat as zero by MCPB.py |
| CV-Y7-M2-Y9 | 3 | 0.00 | 0.00  | 3.0 | Treat as zero by MCPB.py |
| H4-CV-Y5-M2 | 3 | 0.00 | 0.00  | 3.0 | Treat as zero by MCPB.py |
| H4-CV-Y6-M2 | 3 | 0.00 | 0.00  | 3.0 | Treat as zero by MCPB.py |
| H4-CV-Y7-M2 | 3 | 0.00 | 0.00  | 3.0 | Treat as zero by MCPB.py |
| H5-CR-Y5-M2 | 3 | 0.00 | 0.00  | 3.0 | Treat as zero by MCPB.py |
| H5-CR-Y6-M2 | 3 | 0.00 | 0.00  | 3.0 | Treat as zero by MCPB.py |



|             |   |      |      |     |                          |
|-------------|---|------|------|-----|--------------------------|
| H5-CR-Y7-M2 | 3 | 0.00 | 0.00 | 3.0 | Treat as zero by MCPB.py |
| M2-Y8-n2-Y9 | 3 | 0.00 | 0.00 | 3.0 | Treat as zero by MCPB.py |
| M2-Y9-n2-Y8 | 3 | 0.00 | 0.00 | 3.0 | Treat as zero by MCPB.py |
| NA-CR-Y5-M2 | 3 | 0.00 | 0.00 | 3.0 | Treat as zero by MCPB.py |
| NA-CR-Y6-M2 | 3 | 0.00 | 0.00 | 3.0 | Treat as zero by MCPB.py |
| NA-CR-Y7-M2 | 3 | 0.00 | 0.00 | 3.0 | Treat as zero by MCPB.py |
| Y5-M2-Y6-CR | 3 | 0.00 | 0.00 | 3.0 | Treat as zero by MCPB.py |
| Y5-M2-Y6-CV | 3 | 0.00 | 0.00 | 3.0 | Treat as zero by MCPB.py |
| Y5-M2-Y7-CR | 3 | 0.00 | 0.00 | 3.0 | Treat as zero by MCPB.py |
| Y5-M2-Y7-CV | 3 | 0.00 | 0.00 | 3.0 | Treat as zero by MCPB.py |
| Y5-M2-Y8-n2 | 3 | 0.00 | 0.00 | 3.0 | Treat as zero by MCPB.py |
| Y5-M2-Y9-n2 | 3 | 0.00 | 0.00 | 3.0 | Treat as zero by MCPB.py |
| Y6-M2-Y7-CR | 3 | 0.00 | 0.00 | 3.0 | Treat as zero by MCPB.py |
| Y6-M2-Y7-CV | 3 | 0.00 | 0.00 | 3.0 | Treat as zero by MCPB.py |
| Y6-M2-Y8-n2 | 3 | 0.00 | 0.00 | 3.0 | Treat as zero by MCPB.py |
| Y6-M2-Y9-n2 | 3 | 0.00 | 0.00 | 3.0 | Treat as zero by MCPB.py |
| Y7-M2-Y8-n2 | 3 | 0.00 | 0.00 | 3.0 | Treat as zero by MCPB.py |
| Y7-M2-Y9-n2 | 3 | 0.00 | 0.00 | 3.0 | Treat as zero by MCPB.py |
| Y9-M2-Y8-n2 | 3 | 0.00 | 0.00 | 3.0 | Treat as zero by MCPB.py |
| n2-Y9-M2-Y8 | 3 | 0.00 | 0.00 | 3.0 | Treat as zero by MCPB.py |

IMPR

NONB

|    |        |              |                                                                     |
|----|--------|--------------|---------------------------------------------------------------------|
| M2 | 1.4090 | 0.0172100000 | IOD set for Cu <sup>2+</sup> ion from Li et al. JCTC, 2013, 9, 2733 |
| Y5 | 1.8240 | 0.1700       | OPLS                                                                |
| Y6 | 1.8240 | 0.1700       | OPLS                                                                |
| Y7 | 1.8240 | 0.1700       | OPLS                                                                |
| Y8 | 1.6612 | 0.2100       | OPLS                                                                |
| Y9 | 1.6612 | 0.2100       | OPLS                                                                |

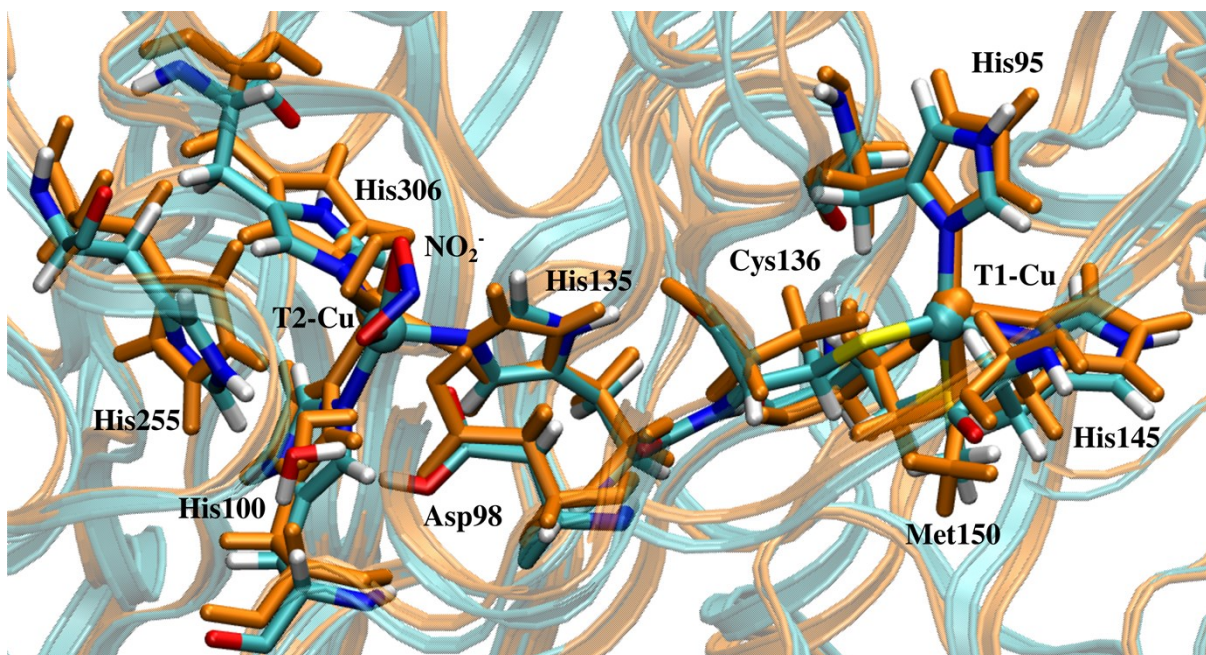

Figure S1. Comparison of the crystal structure of nitrite-bound *A. faecalis* CuNiR (PDB ID: 1SJM; depicted in cyan), and the nitrite-bound *A. faecalis* CuNiR after classical molecular dynamics simulations (depicted in orange).

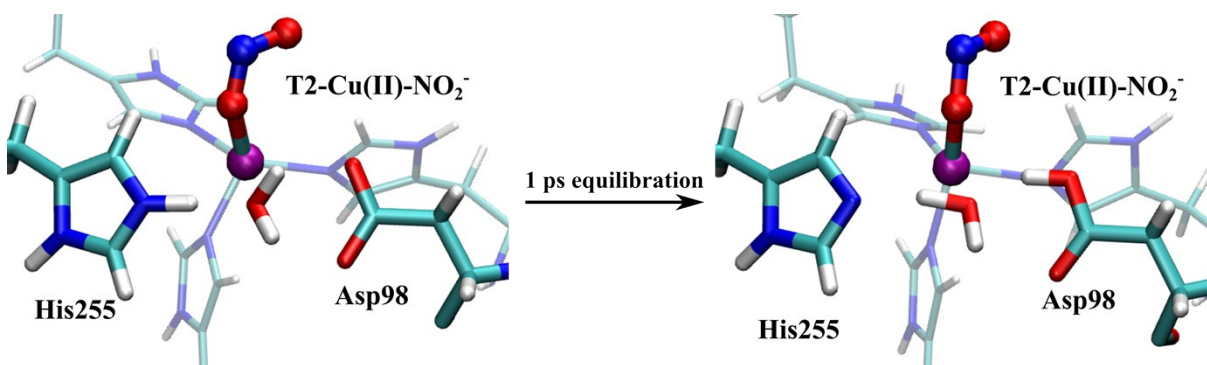

Figure S2. A representation of the nitrite-bound *A. faecalis* CuNiR at the ASP-HIP protonation state where Asp98 is deprotonated and His255 is protonated. After 1 ps of QM/MM equilibration, convergence to the ASH-HID protonation state where Asp98 is protonated and His255 is protonated, is observed.

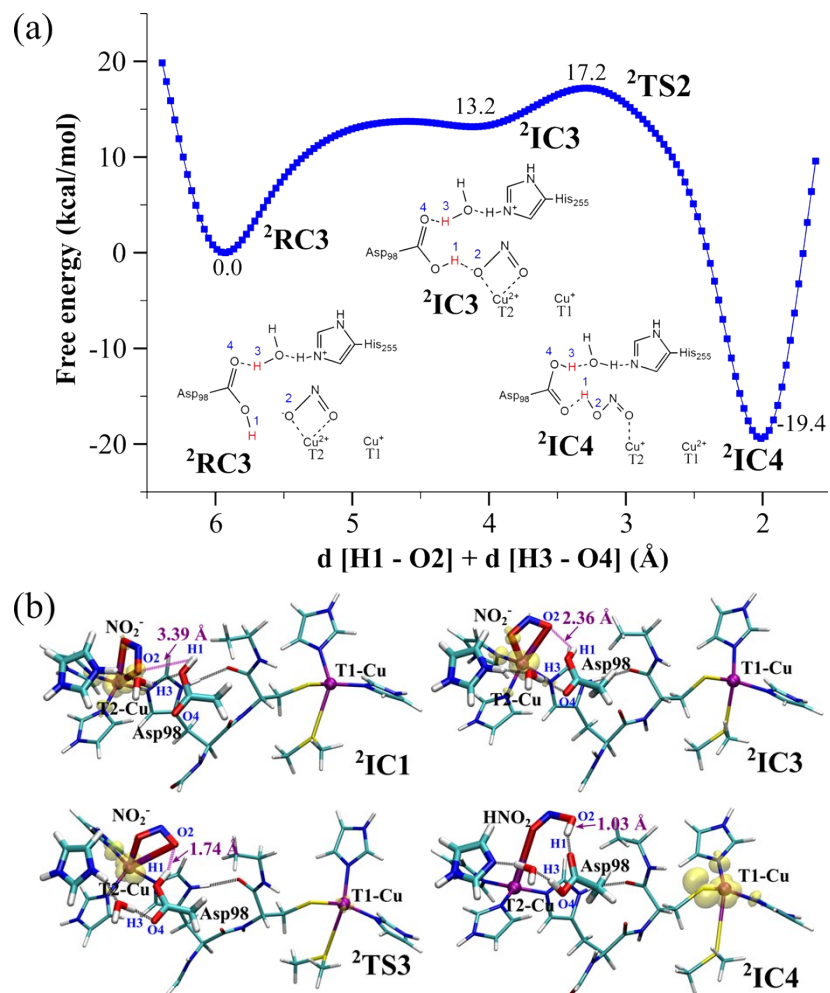

Figure S3. (a) The QM(B3LYP)/MM-MetD calculated free-energy profile for proton transfer from Asp98 in CuNiR using the TZVP basis set. The reaction coordinate is defined as the sum of the distance between the H1 of Asp98 and the O2 of nitrite, and the distance between H3 of bridging water and O4 of Asp98. The width of the Gaussian shaped potential hills was set to 0.3 Å. (b) The representative structures of the QM region along the reaction pathway, with spin-up isodensity surfaces plotted in yellow. Slightly different with the free energy profile obtained at DZVP basis set (Figure 5), here we sampled an intermediate  ${}^2\text{IC2}$  corresponding to the proximal conformer of Asp98.

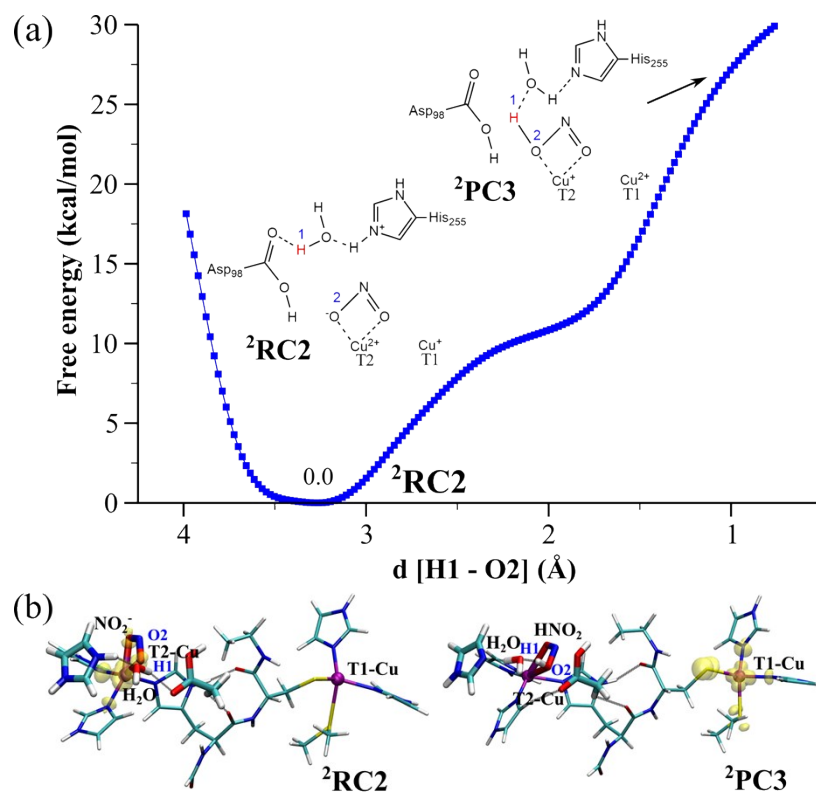

Figure S4. The QM(B3LYP)/MM-MetD calculated free-energy profile for proton transfer from bridging water in CuNiR. The reaction coordinate is defined as the distance difference between O2 of nitrite and H1 of bridging water. (b) The representative structures of the QM region along the reaction pathway, with spin-up isodensity surfaces plotted in yellow.

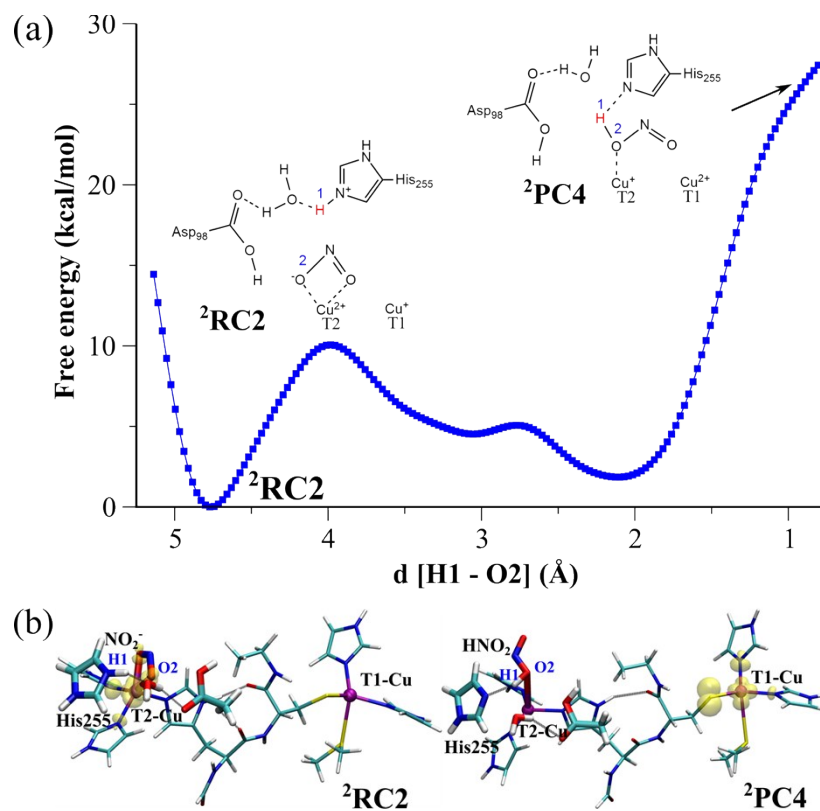

Figure S5. (a) The QM(B3LYP)/MM-MetD calculated free-energy profile for proton transfer from His255 in CuNiR. The reaction coordinate is defined as the distance difference between O2 of nitrite and H1 of His255. (b) The representative structures of the QM region along the reaction pathway, with spin-up isodensity surfaces plotted in yellow.

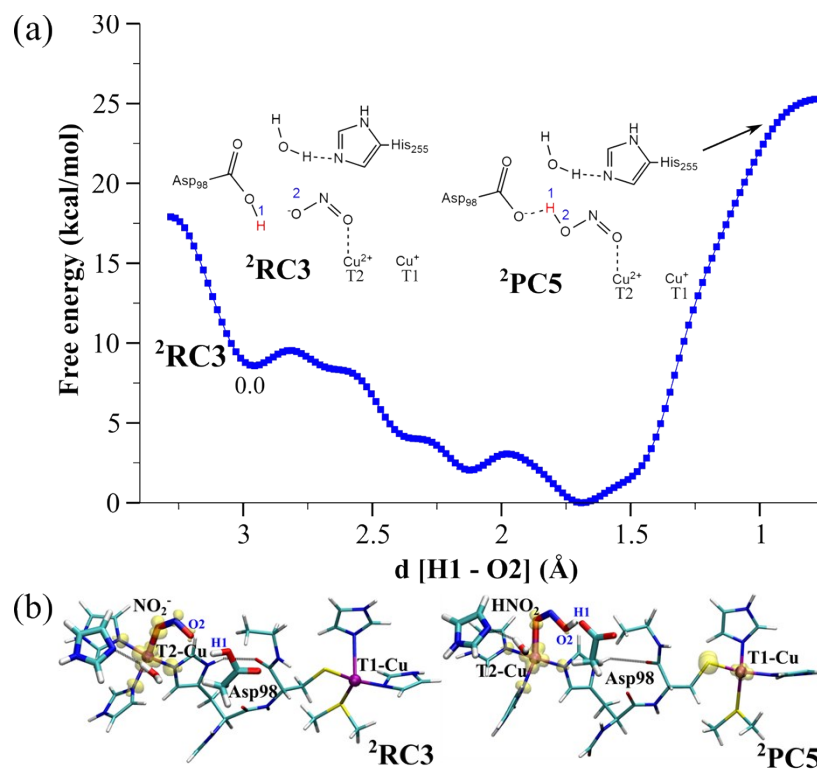

Figure S6. The QM(B3LYP)/MM-MetD calculated free-energy profile for proton transfer from Asp98 in CuNiR at the ASH-HID protonation state, where Asp98 is protonated and His255 is deprotonated. The reaction coordinate is defined as the distance difference between O2 of nitrite and H1 of Asp98. (b) The representative structures of the QM region along the reaction pathway, with spin-up isodensity surfaces plotted in yellow.

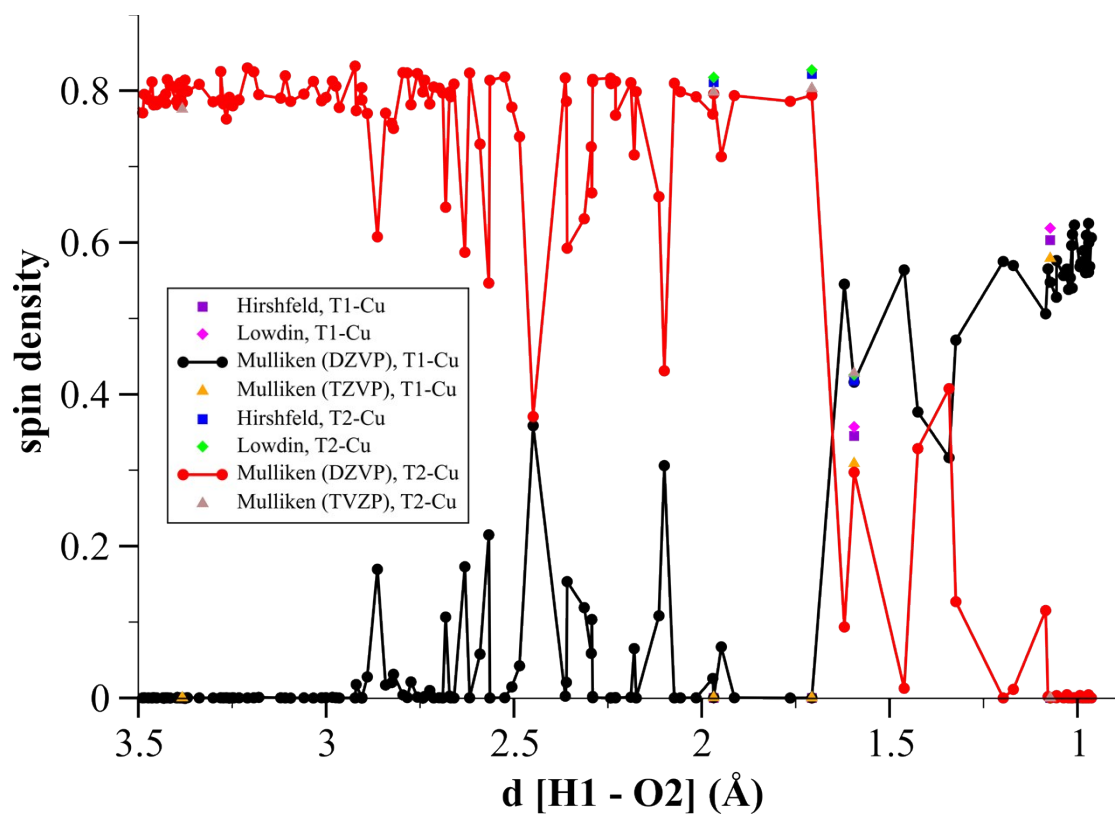

Figure S7. Calculated spin density at snapshots of interest of T1-Cu and T2-Cu with different population analysis methods, overlaid with Mulliken population analysis results using the DZVP basis set. Mulliken population analysis was performed with the DZVP and TZVP basis sets.



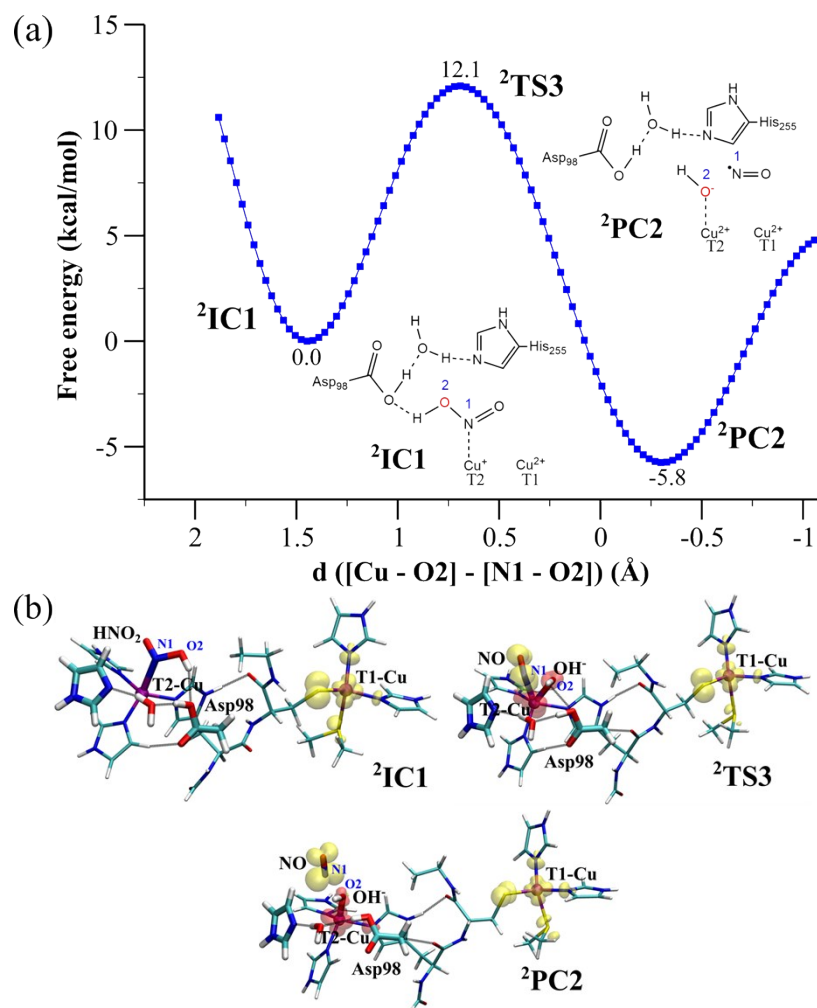

Figure S8. (a) The QM(B3LYP)/MM-MetD calculated free-energy profile for nitric oxide product release in CuNiR. The reaction coordinate is defined as the distance difference between T2-Cu and O2 of nitrite ( $d_1$ ) and that between N1 of nitrite to O2 of nitrite ( $d_2$ ). The width of the Gaussian shaped potential hills was set to 0.3 Å. (b) The representative structures of the QM region along the reaction pathway, with spin-up and spin-down isodensity surfaces plotted in yellow and red, respectively.
